# Supplementary material
Source: HighWire-hosted journal article supplement (https://gh.bmj.com/content/6/7/e005670)
Supplement: inline-supplementary-material-1 [file inline-supplementary-material-1.pdf]

**Supplementary Table 1: Study Characteristics**

| Reference                         | Study Design          | Country     | Infections Assessed                                                                                                                                                  | Type of Test    | Test Name                                                                                                                           | Population                                       | Sample Size |
|-----------------------------------|-----------------------|-------------|----------------------------------------------------------------------------------------------------------------------------------------------------------------------|-----------------|-------------------------------------------------------------------------------------------------------------------------------------|--------------------------------------------------|-------------|
| Bercot, 2015 <sup>1</sup>         | Cross-sectional       | France      | <i>C trachomatis</i> ,<br><i>N gonorrhoeae</i> ,<br><i>T vaginalis</i> ,<br><i>M genitalium</i> ,<br><i>M hominis</i> ,<br><i>U urealyticum</i> ,<br><i>U parvum</i> | Molecular Assay | Anyplex II STI-7 Detection Kit PCR                                                                                                  | Symptomatic and paucisymptomatic patients        | 202         |
| Brosh-Nissimov, 2018 <sup>2</sup> | Retrospective cohort  | Israel      | <i>C trachomatis</i> ,<br><i>N gonorrhoeae</i> ,<br><i>T vaginalis</i> ,<br><i>M genitalium</i> ,<br><i>M hominis</i> ,<br><i>U urealyticum</i> ,<br><i>U parvum</i> | Molecular Assay | Anyplex II STI-7 Detection Kit PCR                                                                                                  | Female and male Israeli soldiers                 | 2816        |
| Causer, 2015 <sup>3</sup>         | Cross-sectional       | Australia   | <i>C trachomatis</i> ,<br><i>N gonorrhoeae</i>                                                                                                                       | Molecular Assay | GeneXpert CT/NG Test                                                                                                                | Aboriginal populations                           | 198         |
| Causer, 2018 <sup>4</sup>         | Cluster RCT crossover | Australia   | <i>C trachomatis</i> ,<br><i>N gonorrhoeae</i>                                                                                                                       | Molecular Assay | GeneXpert CT/NG Test                                                                                                                | Individuals presenting for STI testing           | 2486        |
| Choe, 2013 <sup>5</sup>           | Cross-sectional       | South Korea | <i>C trachomatis</i> ,<br><i>N gonorrhoeae</i> ,<br><i>T vaginalis</i> ,<br><i>M genitalium</i> ,<br><i>M hominis</i> ,<br><i>U urealyticum</i>                      | Molecular Assay | Anyplex II STI-7 Detection Kit PCR, Seeplex PCR, BD ProbeTec strand displacement amplification, AmpliSens PCR, Mycoplasma IST 2 Kit | Symptomatic patients and asymptomatic volunteers | 897         |

| Reference                        | Study Design    | Country       | Infections Assessed                                                                                                | Type of Test               | Test Name                                                                       | Population                                                                                                                                                                | Sample Size |
|----------------------------------|-----------------|---------------|--------------------------------------------------------------------------------------------------------------------|----------------------------|---------------------------------------------------------------------------------|---------------------------------------------------------------------------------------------------------------------------------------------------------------------------|-------------|
| De Baetselier, 2018 <sup>6</sup> | Cross-sectional | Belgium       | <i>C trachomatis</i> ,<br><i>N gonorrhoeae</i>                                                                     | Molecular Assay            | Abbott Real-Time (RT) CT/NG assay                                               | MSM                                                                                                                                                                       | 98          |
| De Baetselier, 2017 <sup>7</sup> | Cross-sectional | Belgium       | <i>M genitalium</i> ,<br><i>T vaginalis</i>                                                                        | Molecular Assay            | S-DiaMGTV multiplex kit of Diagenode                                            | MSM                                                                                                                                                                       | 1768        |
| Fernandez, 2016 <sup>8</sup>     | Cross-sectional | Spain         | <i>C trachomatis</i> ,<br><i>M genitalium</i> ,<br><i>M hominis</i> ,<br><i>U urealyticum</i> ,<br><i>U parvum</i> | Molecular Assay            | Anyplex II STI-7 Detection Kit PCR                                              | Individuals seeking care suspected of having an STI, HIV-negative men who have sex with men                                                                               | 267         |
| Fisher, 2015 <sup>9</sup>        | Cross-sectional | United States | HCV                                                                                                                | Immunochromatographic Test | MedMira HIV/HCV, MedMira HIV/HCV/HBV, Chembio HIV/HCV, Chembio HIV/HCV/syphilis | At-risk individuals (>15 years of age), including injection drug users; women with at least two recent partners; men who have sex with men/women; transgender individuals | 1048        |
| Foschi, 2017 <sup>10</sup>       | NA              | Italy         | <i>C trachomatis</i> ,<br><i>N gonorrhoeae</i>                                                                     | Molecular Assay            | Aptima Combo2 <sup>®</sup> for CT and NG detection                              | Women attending outpatient STI clinics complaining of genital STI-related symptoms or reporting unsafe intercourse                                                        | 100         |

| Reference                    | Study Design    | Country                  | Infections Assessed                                                                                                   | Type of Test               | Test Name                                                             | Population                                        | Sample Size |
|------------------------------|-----------------|--------------------------|-----------------------------------------------------------------------------------------------------------------------|----------------------------|-----------------------------------------------------------------------|---------------------------------------------------|-------------|
| Gimenes, 2014 <sup>11</sup>  | Cross-sectional | Brazil                   | <i>C trachomatis</i> ,<br><i>N gonorrhoeae</i> ,<br><i>M genitalium</i> , HSV 1,<br>HSV-2, <i>T pallidum</i> ,<br>HPV | Molecular Assay            | PCR-Restriction Fragment Length Polymorphism (PCR-RFLP)               | Infertile men                                     | 76          |
| Han, 2014 <sup>12</sup>      | Cross-sectional | China                    | <i>C trachomatis</i> ,<br><i>N gonorrhoeae</i>                                                                        | Molecular Assay            | Abbott RealTime CT/NG assay on the automated m2000 molecular platform | Female sex workers                                | 997         |
| Ho, 2015 <sup>13</sup>       | Cross-sectional | Taiwan                   | HPV                                                                                                                   | Molecular Assay            | Multiplex real-time quantitative reverse transcriptase PCR            | Women                                             | 684         |
| Jahan, 2014 <sup>14</sup>    | Cross-sectional | Bangladesh               | <i>C trachomatis</i> ,<br><i>N gonorrhoeae</i>                                                                        | Molecular Assay            | PCR                                                                   | Males suspected of having urethritis              | 185         |
| Kalla, 2019 <sup>15</sup>    | NA              | Cameroon                 | HIV, HBV, HCV                                                                                                         | Immunochromatographic Test | HIV/HCV/HBsAg (Triplex, Biosynex, France)                             | Volunteers                                        | 1206        |
| Le Goff, 2010 <sup>16</sup>  | NA              | Central African Republic | HSV-1, HSV-2                                                                                                          | Molecular Assay            | BioPlex 2200 immunoassay system                                       | Adults clinically asymptomatic for herpes disease | 51          |
| Le Roy, 2012 <sup>17</sup>   | Cross-sectional | France                   | <i>C trachomatis</i> ,<br><i>N gonorrhoeae</i> ,<br><i>M genitalium</i>                                               | Molecular Assay            | Bio-Rad Dx CT/NG/MG assay                                             | Males and females attending an STI clinic         | 453         |
| Lodiongo, 2018 <sup>18</sup> | Cross-sectional | Sudan                    | HIV, <i>T pallidum</i>                                                                                                | Immunochromatographic Test | SD Bioline HIV/Syphilis Duo RDT                                       | Pregnant women                                    | 442         |

| Reference                           | Study Design       | Country                  | Infections Assessed                                                                                                                                                                                           | Type of Test               | Test Name                                          | Population                                           | Sample Size |
|-------------------------------------|--------------------|--------------------------|---------------------------------------------------------------------------------------------------------------------------------------------------------------------------------------------------------------|----------------------------|----------------------------------------------------|------------------------------------------------------|-------------|
| Longo, 2018 <sup>19</sup>           | Cross-sectional    | Central African Republic | HIV, HBV, HCV                                                                                                                                                                                                 | Immunochromatographic Test | HIV/HCV/HBsAG Combo Rapid Test Cassette (ITHD-C43) | Patients with unknown HIV status                     | 71          |
| Lorea, 2018 <sup>20</sup>           | Cross-sectional    | Belgium                  | <i>C trachomatis</i> ,<br><i>M genitalium</i>                                                                                                                                                                 | Molecular Assay            | Taqman Array Card                                  | Female students and MSM                              | 129         |
| Loubinoux, 2012 <sup>21</sup>       | Prospective cohort | NA                       | <i>C trachomatis</i> ,<br><i>N gonorrhoeae</i> ,<br><i>M genitalium</i>                                                                                                                                       | Molecular Assay            | Dx CT/ NG/MG real-time multiplex PCR               | Men and women                                        | 840         |
| Mawu, 2009 <sup>22</sup>            | NA                 | Indonesia                | <i>C trachomatis</i> ,<br><i>N gonorrhoeae</i> ,<br><i>M genitalium</i> ,<br><i>T vaginalis</i>                                                                                                               | Molecular Assay            | Multiplex PCR                                      | Female sex workers                                   | 221         |
| Mboumba Bouassa, 2018 <sup>23</sup> | Cross-sectional    | Chad                     | HIV, HBV, HCV                                                                                                                                                                                                 | Immunochromatographic Test | HIV/HCV/HBsAG Combo Rapid Test Cassette (ITHD-C43) | Childbearing aged women in resource limited settings | 266         |
| McKechnie, 2009 <sup>24</sup>       | Cross-sectional    | Australia                | <i>C trachomatis</i> ,<br><i>N gonorrhoeae</i> ,<br><i>M genitalium</i> , HSV-1,<br>adenovirus,<br><i>T vaginalis</i> ,<br><i>M hominis</i> ,<br>N meningitidis,<br><i>U urealyticum</i> ,<br><i>U parvum</i> | Molecular Assay            | Multiplex PCR-based reverse line blot (mPCR/RLB)   | Male patients with and without urethral symptoms     | 529         |

| Reference                           | Study Design    | Country          | Infections Assessed                                                                                     | Type of Test               | Test Name                                                          | Population                                                                                                                             | Sample Size |
|-------------------------------------|-----------------|------------------|---------------------------------------------------------------------------------------------------------|----------------------------|--------------------------------------------------------------------|----------------------------------------------------------------------------------------------------------------------------------------|-------------|
| Menzato, 2018 <sup>25</sup>         | Cross-sectional | Guinea Bissau    | HIV                                                                                                     | Immunochromatographic Test | Abbott Determine                                                   | Inhabitants of rural Guinea Bissau, West Africa                                                                                        | 898         |
| Muvunyi, 2011 <sup>26</sup>         | Case-control    | Rwanda           | <i>N gonorrhoeae</i> ,<br><i>C trachomatis</i> ,<br><i>T vaginalis</i> ,<br><i>M genitalium</i> , HSV-2 | Molecular Assay            | Multiplex ligation-dependent probe amplification (STDFinder assay) | infertile women                                                                                                                        | 242         |
| Nateghi Rostami, 2017 <sup>27</sup> | Cross-sectional | Iran             | <i>N gonorrhoeae</i> ,<br><i>T vaginalis</i> ,<br><i>C trachomatis</i>                                  | Molecular Assay            | Multiplex PCR                                                      | Women seeking care for genital complaints                                                                                              | 300         |
| Nunez-Forero, 2016 <sup>28</sup>    | Cross-sectional | Colombia         | <i>N gonorrhoeae</i> ,<br><i>C trachomatis</i> ,<br><i>T pallidum</i>                                   | Molecular Assay            | Acon Duo (for NG and CT)                                           | Sexually active women aged 14-49 years with lower urinary tract infection symptoms                                                     | 1444        |
| Omoding, 2014 <sup>29</sup>         | Cross-sectional | Uganda           | HIV, <i>T pallidum</i>                                                                                  | Immunochromatographic Test | SD Bioline HIV/Syphilis Duo RDT                                    | Pregnant women                                                                                                                         | 220         |
| Pant Pai, 2014 <sup>30</sup>        | Cross-sectional | Canada and India | HIV, HBV, HCV <i>T pallidum</i>                                                                         | Immunochromatographic Test | Mirad rapid TP/HBV/HIV/HCV antibody test (MedMira)                 | Injection drug users/ STI clinic attendees with an at-risk profile (migrants, commercial sex workers, labourers who have paid for sex) | 484         |

| Reference                       | Study Design       | Country       | Infections Assessed                                                                             | Type of Test               | Test Name                                          | Population                                                                         | Sample Size |
|---------------------------------|--------------------|---------------|-------------------------------------------------------------------------------------------------|----------------------------|----------------------------------------------------|------------------------------------------------------------------------------------|-------------|
| Pant Pai, 2019 <sup>31</sup>    | Cross-sectional    | India         | HIV, HBV, HCV                                                                                   | Immunochromatographic Test | Multiplo HBc/HIV/HCV                               | Pregnant women presenting to care to outreach rural service units                  | 510         |
| Parnell, 2014 <sup>32</sup>     | Cross-sectional    | NA            | HSV, <i>T pallidum</i>                                                                          | Molecular Assay            | Abbott Architect                                   | Patients with syphilis                                                             | 47          |
| Roberts, 2011 <sup>33</sup>     | Cross-sectional    | NA            | HPV                                                                                             | Molecular Assay            | Internally developed multiplex HPV PCR system      | Women aged 16-23 years                                                             | 377         |
| Rumyantseva, 2015 <sup>34</sup> | Cross-sectional    | Sweden        | <i>N gonorrhoeae</i> ,<br><i>C trachomatis</i> ,<br><i>M genitalium</i> ,<br><i>T vaginalis</i> | Molecular Assay            | AmpliSens PCR assay                                | STI clinic attendees                                                               | 1261        |
| Sachdev, 2013 <sup>35</sup>     | Cross-sectional    | India         | <i>N gonorrhoeae</i> ,<br><i>C trachomatis</i>                                                  | Molecular Assay            | Internally developed multiplex PCR system          | Women visiting gynaecology departments                                             | 412         |
| Sednaoui, 2011 <sup>36</sup>    | Prospective cohort | France        | <i>C trachomatis</i> ,<br><i>N gonorrhoeae</i> ,<br><i>M genitalium</i>                         | Molecular Assay            | Bio-Rad Dx CT/NG/MG Assay                          | Individuals who undergo STI screening, medical consultation or biological check-up | 955         |
| Stafylis, 2019 <sup>37</sup>    | Cross-sectional    | United States | HIV, <i>T pallidum</i>                                                                          | Immunochromatographic Test | INSTI HIV-1/HIV-2/syphilis rapid antibody test kit | Individuals presenting for outpatient care at an AIDS Healthcare Foundation clinic | 274         |

| Reference                       | Study Design    | Country         | Infections Assessed                                                                         | Type of Test    | Test Name              | Population                                                             | Sample Size |
|---------------------------------|-----------------|-----------------|---------------------------------------------------------------------------------------------|-----------------|------------------------|------------------------------------------------------------------------|-------------|
| Suntoke, 2009 <sup>38</sup>     | Cross-sectional | Uganda          | <i>H ducreyi</i> , <i>T pallidum</i> , HSV-1, HSV-2                                         | Molecular Assay | In-house PCR           | Patients with genital ulcer disease                                    | 100         |
| Vahidnia, 2014 <sup>39</sup>    | Cross-sectional | The Netherlands | <i>C trachomatis</i> , <i>N gonorrhoeae</i> , <i>T vaginalis</i>                            | Molecular Assay | Aurora FLOW            | Individuals with clinical suspicion of STI                             | 896         |
| Van der Pol, 2017 <sup>40</sup> | Cross-sectional | United States   | <i>C trachomatis</i> , <i>N gonorrhoeae</i> , <i>T vaginalis</i>                            | Molecular Assay | BD Max CT/GC/TV        | Individuals presenting for routine STI symptom evaluation or screening | 2689        |
| Vaughn, 2010 <sup>41</sup>      | Cross-sectional | United States   | <i>T pallidum</i> , <i>Ureaplasma</i> spp, <i>M genitalium</i> , <i>T vaginalis</i> , HSV-1 | Molecular Assay | FilmArray STD Panel    | NA                                                                     | 101         |
| Zhao, 2012 <sup>42</sup>        | Cross-sectional | China           | HPV-16, HPV-18, HSV-1, HSV-2                                                                | Molecular Assay | In-house multiplex PCR | Individuals with suspected HPV and HSV infection                       | 187         |

**Supplementary Table 2. STI Case Positivity, Positive Predictive Values and Negative Predictive Values as obtained from Screening Utilizing Molecular Assays**

*A. Chlamydia trachomatis*

| Reference                        | Population at Risk                                                                   | Case Positivity | Prevalence of Co-Infections | Test Name                          | Specimen Type                                                | Positive Predictive Value (95% CI) | Negative Predictive Value (95% CI) |
|----------------------------------|--------------------------------------------------------------------------------------|-----------------|-----------------------------|------------------------------------|--------------------------------------------------------------|------------------------------------|------------------------------------|
| Vahidnia, 2014 <sup>39</sup>     | Males and females with clinical suspicion of STI                                     | 7.1%            | NA                          | Aurora FLOW                        | Vaginal (female)<br>Urine (urethral), rectal & throat (male) | 98.4 (NA)                          | 100.0 (NA)                         |
| Rumyantseva, 2015 <sup>34</sup>  | STI clinic attendees                                                                 | 6.3%            | NA                          | AmpliSens PCR                      | Vaginal & urine (female)<br>Urine (male)                     | 100.0 (95.3-100.0)                 | 99.8 (99.4-100.0)                  |
| Bercot, 2015 <sup>1</sup>        | Symptomatic and paucisymptomatic patients                                            | 30.2%           | 82% with another STI        | Anyplex II STI-7 Detection Kit PCR | Urine, endocervical, vaginal, pelvic fluid                   | 95.5 (92.6-98.3)                   | 92.5 (88.9-96.1)                   |
| Choe, 2013 <sup>5</sup>          | Symptomatic patients and asymptomatic volunteers                                     | 8.0%            | 21.7% with another STI      |                                    | Urine, endocervical                                          | 100.0 (NA)                         | 100.0 (NA)                         |
| Nunez-Forero, 2016 <sup>28</sup> | Sexually active females aged 14-49 years with lower urinary tract infection symptoms | 9.7%            | NA                          | Acon Duo                           | Endocervical                                                 | 94.7 (NA)                          | 91.3 (NA)                          |
| Han, 2014 <sup>12</sup>          | Female sex workers                                                                   | 19.0%           | NA                          | Abbott RealTime CT/NG              | Cervical                                                     | 100.0 (97.3-100.0)                 | 98.5 (97.4-99.2)                   |
| Choe, 2013 <sup>5</sup>          | Symptomatic                                                                          | NA              | NA                          | BD ProbeTec                        | Urine,                                                       | 91.2 (NA)                          | 98.8 (NA)                          |



| Reference                           | Population at Risk                               | Case Positivity | Prevalence of Co-Infections   | Test Name                                                    | Specimen Type         | Positive Predictive Value (95% CI) | Negative Predictive Value (95% CI) |
|-------------------------------------|--------------------------------------------------|-----------------|-------------------------------|--------------------------------------------------------------|-----------------------|------------------------------------|------------------------------------|
|                                     | patients and asymptomatic volunteers             |                 |                               | strand displacement amplification                            | endocervical          |                                    |                                    |
| Choe, 2013 <sup>5</sup>             | Symptomatic patients and asymptomatic volunteers | NA              | NA                            | Seeplex PCR                                                  | Urine, endocervical   | 92.3 (NA)                          | 99.8 (NA)                          |
| Causer, 2015 <sup>3</sup>           | Aboriginal populations                           | 8.3%            | NA                            | GeneXpert CT/NG Test                                         | Urine                 | 94.1 (NA)                          | 99.5 (NA)                          |
| Sednaoui, 2011 <sup>36</sup>        | STI clinic attendees                             | 8.1%            | NA                            | Bio-Rad Dx CT/NG/MG Assay                                    | Urogenital, anorectal | 100.0 (95.3-100.0)                 | 99.8 (99.4-100.0)                  |
| Van der Pol, 2017 <sup>40</sup>     | Male STI clinic attendees                        | 21.8%           | 4.2% with NG                  | BD Max CT/GC/TV                                              | Urine (male)          | 96.1 (NA)                          | 99.4 (NA)                          |
|                                     | Female STI clinic attendees                      | 7.1%            | 1.8% with 2 or more organisms |                                                              | Vaginal (female)      | 99.3 (NA)                          | 98.6 (NA)                          |
| Muvunyi, 2011 <sup>26</sup>         | Infertile females                                | 2.9%            | NA                            | STDFinder (multiplex ligation-dependent probe amplification) | Vaginal               | 100.0 (NA)                         | 100.0 (NA)                         |
| Nateghi Rostani, 2017 <sup>27</sup> | Females presenting with genital complaints       | 11.7%           | 0.7% with NG; 1.0% with TV    | Multiplex PCR                                                | Vaginal               | 100.0 (NA)                         | 100.0 (NA)                         |
| Gimenes, 2014 <sup>11</sup>         | Infertile males                                  | 8.0%            | NA                            | PCR-Restriction Fragment Length                              | Semen                 | 100.0 (NA)                         | 100.0 (NA)                         |

| Reference                         | Population at Risk                                                                                                               | Case Positivity | Prevalence of Co-Infections                                                       | Test Name                                          | Specimen Type                | Positive Predictive Value (95% CI) | Negative Predictive Value (95% CI) |
|-----------------------------------|----------------------------------------------------------------------------------------------------------------------------------|-----------------|-----------------------------------------------------------------------------------|----------------------------------------------------|------------------------------|------------------------------------|------------------------------------|
|                                   |                                                                                                                                  |                 |                                                                                   | Polymorphism (PCR-RFLP)                            |                              |                                    |                                    |
| Brosh-Nissimov, 2018 <sup>2</sup> | Female and male Israeli soldiers                                                                                                 | 6.7%            | 14.0% for MG; 5.0% for NG; 15.4% for TV; 11.7% for UU; 10.2% for UP; 16.2% for MH | Anyplex II STI-7 Detection Kit PCR                 | NA                           | NA                                 | NA                                 |
| Causer, 2018 <sup>4</sup>         | Individuals presenting for STI symptom testing                                                                                   | 8.5%            | NA                                                                                | GeneXpert CT/NG Test                               | Urine                        | NA                                 | NA                                 |
| De Baetselier, 2018 <sup>6</sup>  | Men who have sex with men                                                                                                        | 8.5%            | NA                                                                                | Abbott Real-Time (RT) CT/NG assay                  | Urine, anorectal, pharyngeal | NA                                 | NA                                 |
| Fernandez, 2016 <sup>8</sup>      | Individuals seeking care, young adults (25 years or less) suspected of having an STI, and HIV-negative men who have sex with men | 28.8%           | 3.4% with NG                                                                      | Anyplex II STI-7 Detection Kit PCR                 | Urine                        | NA                                 | NA                                 |
| Foschi, 2017 <sup>10</sup>        | Females attending outpatient STI clinics                                                                                         | 25.0%           | 1.0% with NG; 2.0% with MG                                                        | Aptima Combo2 <sup>®</sup> for CT and NG detection | Urine, vaginal               | NA                                 | NA                                 |
| Jahan, 2014 <sup>14</sup>         | Males suspected of having                                                                                                        | 14.6%           | NA                                                                                | PCR                                                | Urethral discharge           | NA                                 | NA                                 |

| Reference                     | Population at Risk           | Case Positivity | Prevalence of Co-Infections                                                               | Test Name                                        | Specimen Type                | Positive Predictive Value (95% CI) | Negative Predictive Value (95% CI) |
|-------------------------------|------------------------------|-----------------|-------------------------------------------------------------------------------------------|--------------------------------------------------|------------------------------|------------------------------------|------------------------------------|
|                               | urethritis                   |                 |                                                                                           |                                                  |                              |                                    |                                    |
| Le Roy, 2012 <sup>17</sup>    | Asymptomatic females         | 10.2%           | 0.7% with MG; 0.4% with NG                                                                | Bio-Rad Dx CT/NG/MG assay                        | Urine, vaginal, endocervical | NA                                 | NA                                 |
| Le Roy, 2012 <sup>17</sup>    | Symptomatic females          | 11.1%           | NA                                                                                        |                                                  | Urine, vaginal, endocervical | NA                                 | NA                                 |
| Le Roy, 2012 <sup>17</sup>    | Asymptomatic males           | 8.1%            | NA                                                                                        |                                                  | Urine                        | NA                                 | NA                                 |
| Le Roy, 2012 <sup>17</sup>    | Symptomatic males            | 8.3%            | NA                                                                                        |                                                  | Urine, urethral              | NA                                 | NA                                 |
| Lorea, 2018 <sup>20</sup>     | Female students              | 7.7%            | NA                                                                                        | Taqman Array Card                                | NA                           | NA                                 | NA                                 |
| Loubinoux, 2012 <sup>21</sup> | Males                        | 4.9%            | 0.8% with another STI                                                                     | Dx CT/NG/MG real-time multiplex PCR              | Urine, other swabs           | NA                                 | NA                                 |
| Loubinoux, 2012 <sup>21</sup> | Females                      | 6.9%            | NA                                                                                        | Dx CT/NG/MG real-time multiplex PCR              | Urine, vaginal, other swabs  | NA                                 | NA                                 |
| Mawu, 2009 <sup>22</sup>      | Female sex workers           | 27.0%           | NA                                                                                        | Multiplex PCR                                    | Urine, vaginal               | NA                                 | NA                                 |
| McKechnie, 2009 <sup>24</sup> | Males with urethral symptoms | 17.3%           | 0.2% with MG; 0.2% with UU; 0.2% with HSV-1 and UP; 0.2% with NM; 0.2% with HI; 0.4% with | Multiplex PCR-based reverse line blot (mPCR/RLB) | Urine, urethral              | NA                                 | NA                                 |
| McKechnie, 2009 <sup>24</sup> | Males without urethral       | 2.8%            |                                                                                           | Multiplex PCR-based                              | Urine, urethral              | NA                                 | NA                                 |

| Reference                   | Population at Risk                       | Case Positivity | Prevalence of Co-Infections | Test Name                                 | Specimen Type | Positive Predictive Value (95% CI) | Negative Predictive Value (95% CI) |
|-----------------------------|------------------------------------------|-----------------|-----------------------------|-------------------------------------------|---------------|------------------------------------|------------------------------------|
|                             | symptoms                                 |                 | MH                          | reverse line blot (mPCR/RLB)              |               |                                    |                                    |
| Sachdev, 2013 <sup>33</sup> | Females visiting gynaecology departments | 26.3%           | 11.3% with NG               | Internally developed multiplex PCR system | endocervical  | NA                                 | NA                                 |

CI, confidence interval; CT, *Chlamydia trachomatis*; GC or NG, *Neisseria gonorrhoeae*; HI, *Haemophilus influenzae*; HIV, human immunodeficiency virus; HSV, herpes simplex virus; kPCR, kinetic polymerase chain reaction; MG, *Mycoplasma genitalium*; MH, *Mycoplasma hominis*; NA, not available; NM, *Neisseria meningitidis*; STI, sexually-transmitted infection; PCR, polymerase chain reaction; STI, sexually-transmitted infection; TV, *Trichomonas vaginalis*; UP, *Ureaplasma parvum*; UU, *Ureaplasma urealyticum*.

#### B. *Neisseria gonorrhoeae*

| Reference                       | Population at Risk                        | Case Positivity | Prevalence of Co-Infections | Test Name                          | Specimen Type                              | Positive Predictive Value (95% CI) | Negative Predictive Value (95% CI) |
|---------------------------------|-------------------------------------------|-----------------|-----------------------------|------------------------------------|--------------------------------------------|------------------------------------|------------------------------------|
| Rumyantseva, 2015 <sup>34</sup> | STI clinic attendees                      | 0.3%            | NA                          | AmpliSens PCR                      | Vaginal & urine (female)<br>Urine (male)   | 100.0 (40.2-100.0)                 | 100.0 (99.7-100.0)                 |
| Bercot, 2015 <sup>1</sup>       | Symptomatic and paucisymptomatic patients | 13.9%           | 61% with another STI        | Anyplex II STI-7 Detection Kit PCR | Urine, endocervical, vaginal, pelvic fluid | 90.0 (85.9-94.1)                   | 98.4 (NA)                          |
| Choe, 2013 <sup>5</sup>         | Symptomatic patients and asymptomatic     | 4.1%            | 21.7% with another STI      |                                    | Urine, endocervical                        | 79.4 (NA)                          | 100.0 (NA)                         |

| Reference                        | Population at Risk                                                                   | Case Positivity | Prevalence of Co-Infections | Test Name                 | Specimen Type                          | Positive Predictive Value (95% CI) | Negative Predictive Value (95% CI) |
|----------------------------------|--------------------------------------------------------------------------------------|-----------------|-----------------------------|---------------------------|----------------------------------------|------------------------------------|------------------------------------|
|                                  | volunteers                                                                           |                 |                             |                           |                                        |                                    |                                    |
| Han, 2014 <sup>12</sup>          | Female sex workers                                                                   | 2.2%            | NA                          | Abbott RealTime CT/NG     | Cervical                               | 95.5 (75.1-99.2)                   | 99.9 (99.3-100.0)                  |
| Sednaoui, 2011 <sup>36</sup>     | STI clinic attendees                                                                 | 3.5%            | NA                          | Bio-Rad Dx CT/NG/MG Assay | Urine, vaginal, endocervical, urethral | 93.8 (NA)                          | 100.0 (NA)                         |
| Choe, 2013 <sup>5</sup>          | Symptomatic patients and asymptomatic volunteers                                     | NA              | NA                          | Seeplex PCR               | Urine, endocervical                    | 90.0 (NA)                          | 100.0 (NA)                         |
| Choe, 2013 <sup>5</sup>          | Symptomatic patients and asymptomatic volunteers                                     | NA              | NA                          | BD ProbeTec SDA           | Urine, endocervical                    | 96.0 (NA)                          | 99.7 (NA)                          |
| Causer, 2015 <sup>3</sup>        | Aboriginal populations                                                               | 3.5%            | NA                          | GeneXpert CT/NG Test      | Urine                                  | 100.0 (NA)                         | 100.0 (NA)                         |
| Nunez-Forero, 2016 <sup>28</sup> | Sexually active females aged 14-49 years with lower urinary tract infection symptoms | 1.4%            | NA                          | Acon Duo                  | Endocervical                           | 50.0 (NA)                          | 98.6 (NA)                          |
| Van der Pol, 2017 <sup>40</sup>  | Female STI clinic attendees                                                          | 2.3%            | NA                          | BD Max CT/GC/TV           | Vaginal (female)                       | 95.5 (NA)                          | 99.8 (NA)                          |
|                                  | Male STI clinic attendees                                                            | 12.9%           | NA                          |                           | Urine (male)                           | 99.1 (NA)                          | 100.0 (NA)                         |
| Jahan, 2014 <sup>14</sup>        | symptoms suggestive of urethritis having urethral discharge                          | 30.3%           | NA                          | PCR                       | Urethral discharge                     | 87.5 (NA)                          | 100.0 (NA)                         |

| Reference                           | Population at Risk                             | Case Positivity | Prevalence of Co-Infections                                          | Test Name                                                    | Specimen Type                | Positive Predictive Value (95% CI) | Negative Predictive Value (95% CI) |
|-------------------------------------|------------------------------------------------|-----------------|----------------------------------------------------------------------|--------------------------------------------------------------|------------------------------|------------------------------------|------------------------------------|
| Muvunyi, 2011 <sup>26</sup>         | Infertile females                              | 4.1%            | NA                                                                   | STDFinder (multiplex ligation-dependent probe amplification) | Vaginal                      | 100.0 (NA)                         | 100.0 (NA)                         |
| Nateghi Rostami, 2017 <sup>27</sup> | Females presenting with genital complaints     | 5.7%            | 0.7% with CT; 1.7% with TV                                           | Multiplex PCR                                                | Vaginal                      | 81.0 (NA)                          | 100.0 (NA)                         |
| Gimenes, 2014 <sup>11</sup>         | Infertile males                                | 4.0%            | NA                                                                   | PCR-Restriction Fragment Length Polymorphism (PCR-RFLP)      | Semen                        | 100.0 (NA)                         | 100.0 (NA)                         |
| Brosh-Nissimov, 2018 <sup>2</sup>   | Female and male Israeli soldiers               | 0.6%            | 0.5% with CT; 3.5% with MG; 0.6% with UU; 0.5% with UP; 0.5% with MH | Anyplex II STI-7 Detection Kit PCR                           | NA                           | NA                                 | NA                                 |
| Causer, 2018 <sup>4</sup>           | Individuals presenting for STI symptom testing | 5.8%            | NA                                                                   | GeneXpert CT/NG Test                                         | Urine, vaginal               | NA                                 | NA                                 |
| De Baetselier, 2018 <sup>6</sup>    | Men who have sex with men                      | 6.8%            | NA                                                                   | Abbott Real-Time (RT) CT/NG assay                            | Urine, anorectal, pharyngeal | NA                                 | NA                                 |
| Foschi,                             | Females attending                              | 4.0%            | NA                                                                   | Aptima                                                       | Urine,                       | NA                                 | NA                                 |

| Reference                     | Population at Risk           | Case Positivity | Prevalence of Co-Infections   | Test Name                                        | Specimen Type                | Positive Predictive Value (95% CI) | Negative Predictive Value (95% CI) |
|-------------------------------|------------------------------|-----------------|-------------------------------|--------------------------------------------------|------------------------------|------------------------------------|------------------------------------|
| 2017 <sup>10</sup>            | outpatient STI clinics       |                 |                               | Combo2 <sup>®</sup> for CT and NG detection      | vaginal                      |                                    |                                    |
| Le Roy, 2012 <sup>17</sup>    | Asymptomatic females         | 0.6%            | NA                            | Bio-Rad Dx CT/NG/MG assay                        | Urine, endocervical, vaginal | NA                                 | NA                                 |
| Le Roy, 2012 <sup>17</sup>    | Symptomatic females          | 3.7%            | NA                            |                                                  | Urine, endocervical, vaginal | NA                                 | NA                                 |
| Le Roy, 2012 <sup>17</sup>    | Asymptomatic males           | 0.4%            | NA                            |                                                  | Urine                        | NA                                 | NA                                 |
| Le Roy, 2012 <sup>17</sup>    | Symptomatic males            | 16.7%           | NA                            |                                                  | Urine, urethral              | NA                                 | NA                                 |
| Loubinoux, 2012 <sup>21</sup> | Males                        | 1.2%            | NA                            | Dx CT/NG/MG real-time multiplex PCR              | Urine, other swabs           | NA                                 | NA                                 |
| Loubinoux, 2012 <sup>21</sup> | Females                      | 1.4%            | NA                            |                                                  | Urine, vaginal, other swabs  | NA                                 | NA                                 |
| Mawu, 2009 <sup>22</sup>      | Female sex workers           | 11.0%           | NA                            | Multiplex PCR                                    | Urine, vaginal               | NA                                 | NA                                 |
| McKechnie, 2009 <sup>24</sup> | Males with urethral symptoms | 2.5%            | 0.2% with HI;<br>0.4% with CT | Multiplex PCR-based reverse line blot (mPCR/RLB) | Urine, urethral              | NA                                 | NA                                 |
| Sachdev,                      | Females visiting             | 27.8%           | NA                            | Internally                                       | Endocervical                 | NA                                 | NA                                 |

| Reference                    | Population at Risk                               | Case Positivity | Prevalence of Co-Infections | Test Name                      | Specimen Type                            | Positive Predictive Value (95% CI) | Negative Predictive Value (95% CI) |
|------------------------------|--------------------------------------------------|-----------------|-----------------------------|--------------------------------|------------------------------------------|------------------------------------|------------------------------------|
| 2013 <sup>33</sup>           | gynaecology departments                          |                 |                             | developed multiplex PCR system |                                          |                                    |                                    |
| Vahidnia, 2014 <sup>39</sup> | Males and females with clinical suspicion of STI | 1.2%            | NA                          | Aurora FLOW                    | Urine, vaginal, urethral, rectal, throat | NA                                 | NA                                 |

CI, confidence interval; CT, *Chlamydia trachomatis*; GC or NG, *Neisseria gonorrhoeae*; NA, not available; MG, *Mycoplasma genitalium*; MH, *Mycoplasma hominis*; HI, *Haemophilus influenzae*; SDA, strand displacement amplification; STI, sexually-transmitted infection; PCR, polymerase chain reaction; TV, *Trichomonas vaginalis*; UP, *Ureaplasma parvum*; UU, *Ureaplasma urealyticum*.

#### *C. Trichomonas vaginalis*

| Reference               | Population at Risk                               | Case Positivity | Prevalence of Co-Infections | Test Name                          | Specimen Type       | Positive Predictive Value (95% CI) | Negative Predictive Value (95% CI) |
|-------------------------|--------------------------------------------------|-----------------|-----------------------------|------------------------------------|---------------------|------------------------------------|------------------------------------|
| Choe, 2013 <sup>5</sup> | Symptomatic patients and asymptomatic volunteers | 0.1%            | 21.7% with another STI      | Anyplex II STI-7 Detection Kit PCR | Urine, endocervical | 75.0 (NA)                          | 100.0 (NA)                         |
| Choe, 2013 <sup>5</sup> | Symptomatic patients and asymptomatic volunteers | NA              | NA                          | Seeplex PCR                        | Urine, endocervical | 100.0 (NA)                         | 100.0 (NA)                         |
| Choe, 2013 <sup>5</sup> | Symptomatic patients and asymptomatic volunteers | NA              | NA                          | AmpliSens PCR                      | Urine, endocervical | 37.5 (NA)                          | 100.0 (NA)                         |
| Rumyantsev              | STI clinic attendees                             | 0.1%            | NA                          |                                    | Vaginal &           | 100.0 (16.5-                       | 100.0 (99.7-                       |



| Reference                           | Population at Risk                         | Case Positivity | Prevalence of Co-Infections                                     | Test Name                                                    | Specimen Type                        | Positive Predictive Value (95% CI) | Negative Predictive Value (95% CI) |
|-------------------------------------|--------------------------------------------|-----------------|-----------------------------------------------------------------|--------------------------------------------------------------|--------------------------------------|------------------------------------|------------------------------------|
| a, 2015 <sup>34</sup>               |                                            |                 |                                                                 |                                                              | urine (female)<br>Urine (male)       | 100.0)                             | 100.0)                             |
| Nateghi Rostami, 2017 <sup>27</sup> | Females presenting with genital complaints | 32.7%           | 1% with CT;<br>32.7% with NG                                    | Multiplex PCR                                                | Vaginal                              | 100.0 (NA)                         | 100.0 (NA)                         |
| Van Der Pol, 2017 <sup>40</sup>     | Female STI clinic attendees                | 13.5%           | NA                                                              | BD Max CT/GC/TV                                              | Vaginal                              | 96.1 (NA)                          | 98.9 (NA)                          |
| Muvunyi, 2011 <sup>26</sup>         | Infertile females                          | 19.4%           | NA                                                              | STDFinder (multiplex ligation-dependent probe amplification) | Vaginal                              | 55.3 (NA)                          | 100.0 (NA)                         |
| Bercot, 2015 <sup>1</sup>           | Symptomatic and paucisymptomatic patients  | 3.5%            | 100.0% with another STI                                         | Anyplex II STI-7 Detection Kit PCR                           | Urine, endocervical, vaginal, pelvic | NA                                 | NA                                 |
| Brosh-Nissimov, 2018 <sup>2</sup>   | Female and male Israeli soldiers           | 0.4%            | 1.0% with CT;<br>0.9% with UU;<br>1.0% with UP;<br>2.2% with MH | Anyplex II STI-7 Detection Kit PCR                           | NA                                   | NA                                 | NA                                 |
| Mawu, 2009 <sup>22</sup>            | Female sex workers                         | 23.0%           | NA                                                              | Multiplex PCR                                                | Urine, vaginal                       | NA                                 | NA                                 |
| McKechnie, 2009 <sup>24</sup>       | Males with urethral symptoms               | 0.4%            | NA                                                              | Multiplex PCR-based reverse line blot                        | Urine, urethral                      | NA                                 | NA                                 |

| Reference                    | Population at Risk                               | Case Positivity | Prevalence of Co-Infections | Test Name           | Specimen Type                            | Positive Predictive Value (95% CI) | Negative Predictive Value (95% CI) |
|------------------------------|--------------------------------------------------|-----------------|-----------------------------|---------------------|------------------------------------------|------------------------------------|------------------------------------|
|                              |                                                  |                 |                             | (mPCR/RL B)         |                                          |                                    |                                    |
| Vahidnia, 2014 <sup>39</sup> | Males and females with clinical suspicion of STI | 1.1%            | NA                          | Aurora FLOW         | Urine, vaginal, urethral, rectal, throat | NA                                 | NA                                 |
| Vaughn, 2010 <sup>41</sup>   | STD clinic attendees                             | 4.0%            | NA                          | FilmArray STD Panel | Urine                                    | NA                                 | NA                                 |

CI, confidence interval; CT, *Chlamydia trachomatis*; GC, *Neisseria gonorrhoeae*; MH, *Mycoplasma hominis*; NA, not available; PCR, polymerase chain reaction; TV, *Trichomonas vaginalis*; UP, *Ureaplasma parvum*; UU, *Ureaplasma urealyticum*.

#### D. *Treponema pallidum*

| Reference                   | Population at Risk | Case Positivity | Prevalence of Co-Infections | Test Name                                               | Specimen Type | Positive Predictive Value (95% CI) | Negative Predictive Value (95% CI) |
|-----------------------------|--------------------|-----------------|-----------------------------|---------------------------------------------------------|---------------|------------------------------------|------------------------------------|
| Gimenes, 2014 <sup>11</sup> | Infertile males    | 5.3%            | NA                          | PCR-Restriction Fragment Length Polymorphism (PCR-RFLP) | Semen         | 100.0 (NA)                         | 100.0 (NA)                         |
| Suntoke,                    | Genital ulcer      | 5.0%            | 71.0% with                  | In-house                                                | Ulcer, blood  | 100.0 (NA)                         | 93.3 (NA)                          |

| Reference                        | Population at Risk                                                                   | Case Positivity | Prevalence of Co-Infections                                                | Test Name           | Specimen Type | Positive Predictive Value (95% CI) | Negative Predictive Value (95% CI) |
|----------------------------------|--------------------------------------------------------------------------------------|-----------------|----------------------------------------------------------------------------|---------------------|---------------|------------------------------------|------------------------------------|
| 2009 <sup>38</sup>               | disease patients                                                                     |                 | another pathogen                                                           | PCR                 |               |                                    |                                    |
| Nunez-Forero, 2016 <sup>28</sup> | Sexually active females aged 14-49 years with lower urinary tract infection symptoms | 0.9%            | NA                                                                         | Acon Duo            | Endocervical  | NA                                 | NA                                 |
| Vaughn, 2010 <sup>41</sup>       | STD clinic attendees                                                                 | 1.0%            | 9.0% co-infected with two pathogens; 1.0% co-infected with three pathogens | FilmArray STD Panel | Urine         | NA                                 | NA                                 |

CI, confidence interval; NA, not available; PCR, polymerase chain reaction; STD, sexually-transmitted disease.

#### E. Herpes simplex virus

| Reference                   | Strain | Population at Risk | Case Positivity | Prevalence of Co-Infections | Test Name                                    | Specimen Type | Positive Predictive Value (95% CI) | Negative Predictive Value (95% CI) |
|-----------------------------|--------|--------------------|-----------------|-----------------------------|----------------------------------------------|---------------|------------------------------------|------------------------------------|
| Gimenes, 2014 <sup>11</sup> | HSV-1  | Infertile males    | 8.0%            | NA                          | PCR-Restriction Fragment Length Polymorphism | Semen         | 75.0 (NA)                          | 100.0 (NA)                         |

| Reference                     | Strain | Population at Risk                            | Case Positivity | Prevalence of Co-Infections       | Test Name                                               | Specimen Type     | Positive Predictive Value (95% CI) | Negative Predictive Value (95% CI) |
|-------------------------------|--------|-----------------------------------------------|-----------------|-----------------------------------|---------------------------------------------------------|-------------------|------------------------------------|------------------------------------|
|                               |        |                                               |                 |                                   | (PCR-RFLP)                                              |                   |                                    |                                    |
| Suntoke, 2009 <sup>38</sup>   |        | Genital ulcer patients                        | 3.0%            | 64% with HIV or HSV-2             | In-house PCR                                            | Ulcer, blood      | 100.0 (NA)                         | 12.5 (NA)                          |
| Le Goff, 2010 <sup>16</sup>   |        | Clinically asymptomatic adults                | 90.2%           | NA                                | BioPlex 2200 immunoassay system                         | Serum             | NA                                 | NA                                 |
| McKechnie, 2009 <sup>24</sup> |        | Males with urethral symptoms                  | 2.2%            | 0.2% with HI; 0.2% with UP        | Multiplex PCR-based reverse line blot (mPCR/RLB)        | Urine, urethral   | NA                                 | NA                                 |
| McKechnie, 2009 <sup>24</sup> |        | Males without urethral symptoms               | 0.8%            |                                   |                                                         | Urine, urethral   | NA                                 | NA                                 |
| Vaughn, 2010 <sup>41</sup>    |        | STD clinic attendees                          | 3.0%            | NA                                | FilmArray STD Panel                                     | Urine             | NA                                 | NA                                 |
| Zhao, 2012 <sup>42</sup>      |        | Patients with suspected HPV and HSV infection | 10.2%           | 1.6% with HSV-2; 1.1% with HPV-16 | In-house multiplex PCR                                  | Genital, cervical | NA                                 | NA                                 |
| Gimenes, 2014 <sup>11</sup>   | HSV-2  | Infertile males                               | 8.0%            | NA                                | PCR-Restriction Fragment Length Polymorphism (PCR-RFLP) | Semen             | 100.0 (NA)                         | 100.0 (NA)                         |
| Muvunyi, 2011 <sup>26</sup>   |        | Infertile females                             | 6.2%            | NA                                | STDFinder (multiplex ligation-dependent probe)          | Vaginal           | 40.0 (NA)                          | 100.0 (NA)                         |

| Reference                   | Strain                 | Population at Risk                            | Case Positivity | Prevalence of Co-Infections                                                      | Test Name                       | Specimen Type     | Positive Predictive Value (95% CI) | Negative Predictive Value (95% CI) |
|-----------------------------|------------------------|-----------------------------------------------|-----------------|----------------------------------------------------------------------------------|---------------------------------|-------------------|------------------------------------|------------------------------------|
|                             |                        |                                               |                 |                                                                                  | amplification)                  |                   |                                    |                                    |
| Suntoke, 2009 <sup>38</sup> |                        | Genital ulcer patients                        | 61.0%           | 64.0% with HIV or HSV-1                                                          | In-house PCR                    | Ulcer, blood      | 84.5 (NA)                          | 36.1 (NA)                          |
| Le Goff, 2010 <sup>16</sup> |                        | Clinically asymptomatic adults                | 45.1%           | NA                                                                               | BioPlex 2200 immunoassay system | Serum             | NA                                 | NA                                 |
| Zhao, 2012 <sup>42</sup>    |                        | Patients with suspected HPV and HSV infection | 17.1%           | 1.6% with HSV-1; 2.7% with HPV-16; 2.1% with HPV-18; 1.1% with HPV-16 and HPV-18 | In-house multiplex PCR          | Genital, cervical | NA                                 | NA                                 |
| Parnell, 2014 <sup>32</sup> | Unspecified HSV strain | NA                                            | 2.1%            | 2.1% with TP                                                                     | Abbott Architect                | NA                | NA                                 | NA                                 |

CI, confidence interval; HI, *Haemophilus influenzae*; HPV, human papillomavirus; HSV, herpes simplex virus; NA, not available; PCR, polymerase chain reaction; TP, *Treponema pallidum*; UP, *Ureaplasma parvum*.

**Supplementary Table 3. STI Case Positivity, Positive Predictive Values and Negative Predictive Values as obtained from Screening Utilizing Immunochromatographic Tests**

*A. Treponema pallidum*

| Reference                    | Population at Risk   | Case Positivity | Prevalence of Co-Infections | Test Name                                              | Specimen Type         | Positive Predictive Value (95% CI) | Negative Predictive Value (95% CI) |
|------------------------------|----------------------|-----------------|-----------------------------|--------------------------------------------------------|-----------------------|------------------------------------|------------------------------------|
| Omoding, 2014 <sup>29</sup>  | Pregnant females     | 8.6%            | 1.4% with HIV               | SD Bioline HIV/Syphilis Duo Test                       | Venous blood (plasma) | 100.0 (79.1-100.0)                 | 100.0 (97.7-100.0)                 |
| Stafylis, 2019 <sup>37</sup> | STI clinic attendees | 27.0%           | NA                          | INSTI Multiplex HIV-1/HIV-2/syphilis antibody test kit | Fingerstick blood     | 93.3 (NA)                          | 86.0 (NA)                          |
| Lodiongo, 2018 <sup>18</sup> | Pregnant females     | 3.2%            | NA                          | SD Bioline HIV/Syphilis Duo RDT                        | Venous blood          | NA                                 | NA                                 |
| Pant Pai, 2014 <sup>30</sup> | Injection drug users | 1.8%            | NA                          | Miriad rapid TP/HBV/HIV/HCV antibody test (MedMira)    | Fingerstick blood     | NA                                 | NA                                 |
| Pant Pai, 2014 <sup>30</sup> | STD clinic attendees | 9.9%            | NA                          |                                                        |                       | NA                                 | NA                                 |

CI, confidence interval; HIV, human immunodeficiency virus; NA, not available.

## B. Hepatitis C virus

| Reference                 | Population at Risk                                                                                                                    | Case Positivity | Prevalence of Co-Infections | Test Name                 | Specimen Type | Positive Predictive Value (95% CI) | Negative Predictive Value (95% CI) |
|---------------------------|---------------------------------------------------------------------------------------------------------------------------------------|-----------------|-----------------------------|---------------------------|---------------|------------------------------------|------------------------------------|
| Fisher, 2015 <sup>9</sup> | Adult injection drug users, females who engage in risky sexual encounters, mwn who have sex with men and/or women, transgender adults | NA              | NA                          | Chembio HIV/HCV/syp hilis | Whole blood   | 97.1 (93.0-98.9)                   | 98.2 (96.9-99.0)                   |
| Fisher, 2015 <sup>9</sup> | Adult injection drug users, females who engage in risky sexual encounters, mwn who have sex with men and/or women, transgender adults | NA              | NA                          | MedMira HIV/HCV/HBV       | Whole blood   | 100.0 (96.1-100.0)                 | 96.2 (94.4-97.4)                   |
| Fisher, 2015 <sup>9</sup> | Adult injection drug users, females who engage in risky sexual encounters, mwn who have sex with men                                  | 19.2%           | NA                          | MedMira HIV/HCV           | Whole blood   | 100.0 (96.2-100.0)                 | 95.7 (94.0-97.0)                   |

| Reference                           | Population at Risk                                                                                                                    | Case Positivity | Prevalence of Co-Infections | Test Name                                           | Specimen Type   | Positive Predictive Value (95% CI) | Negative Predictive Value (95% CI) |
|-------------------------------------|---------------------------------------------------------------------------------------------------------------------------------------|-----------------|-----------------------------|-----------------------------------------------------|-----------------|------------------------------------|------------------------------------|
|                                     | and/or women, transgender adults                                                                                                      |                 |                             |                                                     |                 |                                    |                                    |
| Fisher, 2015 <sup>9</sup>           | Adult injection drug users, females who engage in risky sexual encounters, mwn who have sex with men and/or women, transgender adults | NA              | NA                          | Chembio HIV/HCV                                     | Whole blood     | 97.4 (93.1-99.2)                   | 98.0 (96.6-98.9)                   |
| Kalla, 2019 <sup>15</sup>           | Volunteers                                                                                                                            | 2.2%            | NA                          | HIV/HCV/HBsAg (Triplex, Biosynex, France)           | Blood           | 100.0 (84.5-100.0)                 | 100.0 (99.6-100.0)                 |
| Longo, 2018 <sup>19</sup>           | Patients with unknown HIV status                                                                                                      | 4.2%            | NA                          | HIV/HCV/HBsAg Combo Rapid Test Cassette (ITHD- C43) | Capillary blood | NA                                 | NA                                 |
| Mboumba Bouassa, 2018 <sup>23</sup> | Childbearing aged females in resource limited settings                                                                                | 7.5%            | NA                          | HIV/HCV/HBsAg Combo Rapid Test Cassette (ITHD- C43) | Capillary blood | NA                                 | NA                                 |



| Reference                    | Population at Risk   | Case Positivity | Prevalence of Co-Infections | Test Name                                           | Specimen Type     | Positive Predictive Value (95% CI) | Negative Predictive Value (95% CI) |
|------------------------------|----------------------|-----------------|-----------------------------|-----------------------------------------------------|-------------------|------------------------------------|------------------------------------|
| Pant Pai, 2014 <sup>30</sup> | Injection drug users | 42.2%           | NA                          | Miriad rapid TP/HBV/HIV/HCV antibody test (MedMira) | Fingerstick blood | NA                                 | NA                                 |
| Pant Pai, 2014 <sup>30</sup> | STD clinic attendees | 0.5%            | NA                          |                                                     |                   | NA                                 | NA                                 |

CI, confidence interval; HIV, human immunodeficiency virus; HCV, hepatitis C virus; NA, not available; STD, sexually-transmitted disease.

### C. Human immunodeficiency virus

| Reference                    | Population at Risk   | Case Positivity | Prevalence of Co-Infections | Test Name                                              | Specimen Type         | Positive Predictive Value (95% CI) | Negative Predictive Value (95% CI) |
|------------------------------|----------------------|-----------------|-----------------------------|--------------------------------------------------------|-----------------------|------------------------------------|------------------------------------|
| Omoding, 2014 <sup>29</sup>  | Pregnant females     | 7.3%            | NA                          | SD Bioline HIV/Syphilis Duo test                       | Venous blood (plasma) | 94.1 (69.2-99.7)                   | 100.0 (97.7-100.0)                 |
| Lodiongo, 2018 <sup>18</sup> | Pregnant females     | 1.8%            | NA                          |                                                        | Venous blood          | 100.0 (63.1-100.0)                 | 100.0 (99.2-100.0)                 |
| Stafylis, 2019 <sup>37</sup> | STI clinic attendees | 29.9%           | NA                          | INSTI Multiplex HIV-1/HIV-2/syphilis antibody test kit | Fingerstick blood     | 100.0 (NA)                         | 99.5 (NA)                          |
| Kalla, 2019 <sup>15</sup>    | Volunteers           | 2.1%            | 0.1% with HBV               | HIV/HCV/HBs Ag (Triplex, Biosynex, France)             | Blood                 | 100.0 (83.4-100.0)                 | 100.0 (99.6-100.0)                 |

| Reference                           | Population at Risk                                     | Case Positivity | Prevalence of Co-Infections | Test Name                                            | Specimen Type     | Positive Predictive Value (95% CI) | Negative Predictive Value (95% CI) |
|-------------------------------------|--------------------------------------------------------|-----------------|-----------------------------|------------------------------------------------------|-------------------|------------------------------------|------------------------------------|
| Longo, 2018 <sup>19</sup>           | Patients with unknown HIV status                       | 7.1%            | 1.4% with HBV               | HIV/HCV/HBs AG Combo Rapid Test Cassette (ITHD- C43) | Capillary blood   | NA                                 | NA                                 |
| Mboumba Bouassa, 2018 <sup>23</sup> | Childbearing aged females in resource limited settings | 3.7%            | 0.4% with HBV               | HIV/HCV/HBs AG Combo Rapid Test Cassette (ITHD- C43) | Capillary blood   | NA                                 | NA                                 |
| Menzato, 2018 <sup>25</sup>         | Inhabitants of rural Guinea Bissau, West Africa        | 6.8%            | NA                          | Abbott Determine                                     | Vaginal           | NA                                 | NA                                 |
| Pant Pai, 2014 <sup>30</sup>        | Injection drug users                                   | 3.7%            | NA                          | Miriad rapid TP/HBV/HIV/H CV antibody test (MedMira) | Fingerstick blood | NA                                 | NA                                 |
| Pant Pai, 2014 <sup>30</sup>        | STD clinic attendees                                   | 14.9%           | NA                          |                                                      |                   | NA                                 | NA                                 |

CI, confidence interval; HBV, hepatitis B virus; HIV, human immunodeficiency virus; NA, not available; STD, sexually-transmitted disease.

#### D. Hepatitis B virus (HBV)

| Reference | Population at Risk | Case Positivity | Prevalence of Co-Infections | Test Name | Specimen Type | Positive Predictive Value (95% CI) | Negative Predictive Value (95% CI) |
|-----------|--------------------|-----------------|-----------------------------|-----------|---------------|------------------------------------|------------------------------------|
|-----------|--------------------|-----------------|-----------------------------|-----------|---------------|------------------------------------|------------------------------------|

| <b>Reference</b>          | <b>Population at Risk</b> | <b>Case Positivity</b> | <b>Prevalence of Co-Infections</b> | <b>Test Name</b>                           | <b>Specimen Type</b> | <b>Positive Predictive Value (95% CI)</b> | <b>Negative Predictive Value (95% CI)</b> |
|---------------------------|---------------------------|------------------------|------------------------------------|--------------------------------------------|----------------------|-------------------------------------------|-------------------------------------------|
| Kalla, 2019 <sup>15</sup> | Volunteers                | 8.6%                   | 0.1% with HIV                      | HIV/HCV/HBs Ag (Triplex, Biosynex, France) | Blood                | 100.0 (95.6-100.0)                        | 100.0 (99.6-100.0)                        |

CI, confidence interval; HIV, human immunodeficiency virus; NA, not available.

**Supplementary Table 4. Additional STI Case Positivity Results****A. Hepatitis B virus (HBV)**

| Reference                           | Population at Risk                                     | Case Positivity | Prevalence of Co-Infections |
|-------------------------------------|--------------------------------------------------------|-----------------|-----------------------------|
| Longo, 2018 <sup>19</sup>           | Patients with unknown HIV status                       | 23.9%           | 1.4% with HIV               |
| Mboumba Bouassa, 2018 <sup>23</sup> | Childbearing aged females in resource limited settings | 3.0%            | 0.4% with HCV               |
| Pant Pai, 2014 <sup>30</sup>        | STD clinic attendees                                   | 20.0%           | NA                          |
| Pant Pai, 2019 <sup>31</sup>        | Pregnant females                                       | 1.1%            | NA                          |

HCV, hepatitis C virus; HIV, human immunodeficiency virus; NA, not available; STD, sexually-transmitted disease.

**B. Human papillomavirus (HPV)**

| Reference                   | Strain  | Population at Risk                                                         | Case Positivity | Prevalence of Co-Infections                                                             |
|-----------------------------|---------|----------------------------------------------------------------------------|-----------------|-----------------------------------------------------------------------------------------|
| Ho, 2015 <sup>13</sup>      | Any HPV | Females with no cervical abnormalities referred to undergo a cervical exam | 92.8%           | NA                                                                                      |
| Ho, 2015 <sup>13</sup>      | Any HPV | Females with cervical dysplasia (<CIN1)                                    | 94.0%           | NA                                                                                      |
| Ho, 2015 <sup>13</sup>      | Any HPV | Females with CIN1                                                          | 90.7%           | NA                                                                                      |
| Ho, 2015 <sup>13</sup>      | Any HPV | Females with CIN2                                                          | 92.6%           | NA                                                                                      |
| Ho, 2015 <sup>13</sup>      | Any HPV | Females with CIN3                                                          | 98.2%           | NA                                                                                      |
| Ho, 2015 <sup>13</sup>      | Any HPV | Females with cervical cancer                                               | 96.1%           | NA                                                                                      |
| Gimenes, 2014 <sup>11</sup> | Any HPV | Infertile males                                                            | 38.0%           | NA                                                                                      |
| Roberts, 2011 <sup>33</sup> | Any HPV | Females aged 16-23 years                                                   | 69.2%           | 51.3% with multiple HPV co-infections                                                   |
| Zhao, 2012 <sup>42</sup>    | HPV-16  | Patients with suspected HPV and HSV infection                              | 22.5%           | 1.6% with HPV-18;<br>1.1% with HSV-1;<br>2.7% with HSV-2;<br>1.1% with HPV-18 and HSV-2 |
| Zhao, 2012 <sup>42</sup>    | HPV-18  | Patients with suspected                                                    | 12.3%           | 1.6% with HPV-16;                                                                       |

| Reference | Strain | Population at Risk    | Case Positivity | Prevalence of Co-Infections                       |
|-----------|--------|-----------------------|-----------------|---------------------------------------------------|
|           |        | HPV and HSV infection |                 | 2.1% with HSV-2;<br>1.1% with HPV-16 and<br>HSV-2 |

CIN, cervical intraepithelial neoplasia; HPV, human papillomavirus; HSV, herpes simplex virus; NA, not available.

### **Supplementary Reference List**

1. Bercot B, Amarsy R, Goubard A, et al. Assessment of coinfection of sexually transmitted pathogen microbes by use of the anyplex II STI-7 molecular kit. *Journal of clinical microbiology* 2015; **53**(3): 991-3.
2. Brosh-Nissimov T, Kedem R, Ophir N, Shental O, Keller N, Amit S. Management of sexually transmissible infections in the era of multiplexed molecular diagnostics: a primary care survey. *Sexual health* 2018.
3. Causer LM, Hengel B, Natoli L, et al. A field evaluation of a new molecular-based point-of-care test for chlamydia and gonorrhoea in remote Aboriginal health services in Australia. *Sexual health* 2015; **12**(1): 27-33.
4. Causer LM, Guy RJ, Tabrizi SN, et al. Molecular test for chlamydia and gonorrhoea used at point of care in remote primary healthcare settings: a diagnostic test evaluation. *Sexually transmitted infections* 2018; **94**(5): 340-5.
5. Choe HS, Lee DS, Lee SJ, et al. Performance of Anyplex II multiplex real-time PCR for the diagnosis of seven sexually transmitted infections: comparison with currently available methods. *International journal of infectious diseases : IJID : official publication of the International Society for Infectious Diseases* 2013; **17**(12): e1134-40.
6. De Baetselier I, Osbak KK, Smet H, Kenyon CR, Crucitti T. Take three, test one: a cross-sectional study to evaluate the molecular detection of Chlamydia trachomatis and Neisseria gonorrhoeae in pooled pharyngeal, anorectal and urine samples versus single-site testing among men who have sex with men in Belgium. *Acta Clinica Belgica: International Journal of Clinical and Laboratory Medicine* 2018.
7. De Baetselier I, Smet H, Vuylsteke B, Crucitti T. Mycoplasma genitalium and trichomonas vaginalis detection in a cohort of men who have sex with men in Belgium: Evaluation of the diagenode s-diamgtv multiplex kit. *Sexually Transmitted Infections* 2017; **93** (Supplement 2): A53.
8. Fernandez G, Martro E, Gonzalez V, et al. Usefulness of a novel multiplex real-time PCR assay for the diagnosis of sexually-transmitted infections. *Enfermedades infecciosas y microbiologia clinica* 2016; **34**(8): 471-6.
9. Fisher DG, Hess KL, Erlyana E, Reynolds GL, Cummins CA, Alonzo TA. Comparison of Rapid Point-of-Care Tests for Detection of Antibodies to Hepatitis C Virus. *Open forum infectious diseases* 2015; **2**(3): ofv101.
10. Foschi C, Banzola N, Gaspari V, D'Antuono A, Cevenini R, Marangoni A. Evaluation of the aptima assays for the detection of bacterial sexually transmitted infections in a selected population of women. *Sexually transmitted infections* 2017; **93** (Supplement 2): A49.
11. Gimenes F, Medina FS, De Abreu ALP, et al. Sensitive simultaneous detection of seven sexually transmitted agents in Semen by multiplex-PCR and of HPV by single PCR. *PLoS ONE* 2014; **9** (6) (no pagination)(e98862).
12. Han Y, Yin YP, Shi MQ, et al. Evaluation of Abbott RealTime CT/NG assay for detection of Chlamydia trachomatis and Neisseria gonorrhoeae in cervical swabs from female sex workers in China. *PLoS ONE* 2014; **9** (3) (no pagination)(e89658).
13. Ho CM, Pan KY, Chen YY, Huang CY, Chen YL, Chang SF. Clinical performance of multiplex high-risk e6 mRNA expression in comparison with HPV DNA subtypes for the identification of women at risk of cervical cancer. *Journal of medical virology* 2015; **87**(8): 1404-12.

14. Jahan F, Shamsuzzaman SM, Akter S. Diagnosis of common bacterial causes of urethritis in men by Gram stain, culture and multiplex PCR. *The Malaysian journal of pathology* 2014; **36**(3): 175-80.
15. Kalla GCM, Voundi EV, Guiadem R, Iii FA, Belec L, Mbopi-Keou FX. Mass campaigns for HIV, HBV (HBsAg) and HCV screening by multiplex rapid diagnostic test in sub-Saharan Africa using mobile units: the game changer. *International Journal of Infectious Diseases* 2019; **79** (Supplement 1): 107.
16. Le Goff J, Gresenguet G, Gody C, Belec L. Detection of IgG antibodies to herpes simplex virus type 1 and 2 in various HIV-positive African populations by the BioPlex 2200 multiplexing immunoassay platform. *Clinical Microbiology and Infection* 2010; **2**): S667.
17. Le Roy C, Le Hen I, Clerc M, et al. The first performance report for the Bio-Rad Dx CT/NG/MG assay for simultaneous detection of Chlamydia trachomatis, Neisseria gonorrhoeae and Mycoplasma genitalium in urogenital samples. *J Microbiol Methods* 2012; **89**(3): 193-7.
18. Lodiongo DK, B KB, G WD, et al. Field evaluation of SD BIOLINE HIV/Syphilis Duo assay among pregnant women attending routine antenatal care in Juba, South Sudan. *PLoS One* 2018; **13**(10): e0205383.
19. Longo JD, Mboumba Bouassa RS, Mbeko Simaleko M, et al. Usefulness of simultaneous screening for HIV-specific and HCV-specific antibodies and HBsAg by a capillary-based multiplex rapid diagnostic test to strengthen linkage-to-care in sub-Saharan patients attending sexually transmitted infection clinic. *Journal of medical virology* 2018; **90**(9): 1549-52.
20. Lorea S, Henrard S, Montesinos I, Goffard JC. Simultaneous detection of multiple sexually transmitted infections (STIs) pathogens with Taqman Array Card (TAC) compared to traditional methods. *Acta Clinica Belgica: International Journal of Clinical and Laboratory Medicine* 2018; **73** (Supplement 2): 54.
21. Loubinoux J, Reglier-Poupet H, Collobert G, Billoet A, Tavares N, Poyart C. Detection of Chlamydia trachomatis, Neisseria gonorrhoeae, and Mycoplasma genitalium in uro-genital samples by the real-time Dx CT/NG/MGTM PCR assay. *Clinical Microbiology and Infection* 2012; **3**): 509.
22. Mawu F, Davies SC, McKechnie M, Sedyaningsih ER, Widiastuti A, Hillman R. Sexually transmitted infections among female sex workers in Manado, Indonesia using a multiplex PCR. *Sexual health* 2009; **6** (4): 371-2.
23. Mboumba Bouassa RS, Nodjikouambaye ZA, Sadjoli D, et al. Usefulness of Simultaneous Screening for HIV- and Hepatitis C-Specific Antibodies and Hepatitis B Surface Antigen by Capillary-Based Multiplex Immunochromatographic Rapid Test to Strengthen Prevention Strategies and Linkage to Care in Childbearing-Aged Women Living in Resource-Limited Settings. *Open forum infectious diseases* 2018; **5**(5): ofy069.
24. McKechnie ML, Hillman R, Couldwell D, et al. Simultaneous identification of 14 genital microorganisms in urine by use of a multiplex PCR-based reverse line blot assay. *Journal of clinical microbiology* 2009; **47**(6): 1871-7.
25. Menzato F, Bosa L, Sifna A, et al. Successful simultaneous screening of sickle cell disease, hiv and tuberculosis in rural guinea bissau, west africa through rapid tests and a standardized clinical questionnaire: An outreach program due to a public-private partnership. *Blood Conference: 60th Annual Meeting of the American Society of Hematology, ASH* 2018; **132**(Suppl. 1).

26. Muvunyi CM, Dhont N, Verhelst R, et al. Evaluation of a new multiplex polymerase chain reaction assay STDFinder for the simultaneous detection of 7 sexually transmitted disease pathogens. *Diagnostic Microbiology and Infectious Disease* 2011; **71**(1): 29-37.
27. Nateghi Rostami M, Hossein Rashidi B, Aghsaghloo F, Habibi A. A multiplex assay of *Trichomonas vaginalis*, *Chlamydia trachomatis* and *Neisseria gonorrhoeae* infections in genital specimens. *Journal of Infection in Developing Countries* 2017; **11**(11): 833-9.
28. Nunez-Forero L, Moyano-Ariza L, Gaitan-Duarte H, et al. Diagnostic accuracy of rapid tests for sexually transmitted infections in symptomatic women. *Sexually Transmitted Infections* 2016; **92**(1): 24-8.
29. Omoding D, Katawera V, Siedner M, Boum Y, 2nd. Evaluation of the SD Bioline HIV/Syphilis Duo assay at a rural health center in Southwestern Uganda. *BMC research notes* 2014; **7**: 746.
30. Pai NP, Dhurat R, Potter M, et al. Will a quadruple multiplexed point-of-care screening strategy for HIV-related co-infections be feasible and impact detection of new co-infections in at-risk populations? Results from cross-sectional studies. *BMJ open* 2014; **4**(12): e005040.
31. Pant Pai N, Daher J, Prashanth HR, et al. Will an innovative connected AideSmart! app-based multiplex, point-of-care screening strategy for HIV and related coinfections affect timely quality antenatal screening of rural Indian women? Results from a cross-sectional study in India. *Sexually transmitted infections* 2019; **95**(2): 133-9.
32. Parnell B, Tong W, Menon-Johansson A. Has the introduction of a multiplex PCR for herpes simplex viruses and *Treponema pallidum* impacted the patient journey for those diagnosed with primary syphilis? *HIV Medicine* 2014; **3**: 112.
33. Roberts CC, Swoyer R, Bryan JT, Taddeo FJ. Comparison of real-time multiplex human papillomavirus (HPV) PCR assays with the linear array HPV genotyping PCR assay and influence of DNA extraction method on HPV detection. *Journal of clinical microbiology* 2011; **49**(5): 1899-906.
34. Rumyantseva T, Golparian D, Nilsson CS, et al. Evaluation of the new AmpliSens multiplex real-time PCR assay for simultaneous detection of *Neisseria gonorrhoeae*, *Chlamydia trachomatis*, *Mycoplasma genitalium*, and *Trichomonas vaginalis*. *APMIS : acta pathologica, microbiologica, et immunologica Scandinavica* 2015; **123**(10): 879-86.
35. Sachdev D, Patel AL, Kumari I, Saluja D. Development of molecular beacon based diagnostic assay for detection of *Neisseria Gonorrhoeae* and *Chlamydia trachomatis*. *Sexually Transmitted Infections Conference: STI and AIDS World Congress* 2013; **89**(SUPPL. 1).
36. Sednaoui P, Nassar N, Allemelou G, Castano F, Monfort L. Evaluation of the Bio-rad Dx CT/NG/MG assay, a new real-time PCR test for the simultaneous detection of *Chlamydia trachomatis*, *Neisseria gonorrhoeae* and *Mycoplasma genitalium*. *Clinical Microbiology and Infection* 2011; **4**: S486.
37. Stafylis C, Bristow CC, Natoli LJ, et al. Field evaluation of a dual rapid Human Immunodeficiency Virus and treponemal syphilis rapid test in community-based clinics in Los Angeles and New York. *Diagnostic microbiology and infectious disease* 2019; **93**(4): 325-8.
38. Suntok TR, Hardick A, Tobian AA, et al. Evaluation of multiplex real-time PCR for detection of *Haemophilus ducreyi*, *Treponema pallidum*, herpes simplex virus type 1 and 2 in the diagnosis of genital ulcer disease in the Rakai District, Uganda. *Sexually transmitted infections* 2009; **85**(2): 97-101.
39. Vahidnia A, Costa S, Veenings S, Tuin H, van Loon L, Blikenhaal H. Comparative evaluation of Roche Aurora FLOW, Becton and Dickinson Viper system, and Dynex DS2 for



- detection of *Chlamydia trachomatis*, *Neisseria gonorrhoeae*, and *Trichomonas vaginalis* in various clinical specimens. *Diagnostic microbiology and infectious disease* 2014; **80**(3): 191-2.
40. Van Der Pol B, Williams JA, Fuller D, Taylor SN, Hook EW. Combined testing for chlamydia, gonorrhea, and trichomonas by use of the BD max CT/GC/TV assay with genitourinary specimen types. *Journal of clinical microbiology* 2017; **55**(1): 155-64.
41. Vaughn M, Gardner J, Barrus C, Bhatia A, Kriesel J, Crisp R. Point of care PCR testing for ten different sexually transmitted diseases in urine samples. *Journal of Molecular Diagnostics* 2010; **12** (6): 893.
42. Zhao Y, Cao X, Tang J, et al. A novel multiplex real-time PCR assay for the detection and quantification of HPV16/18 and HSV1/2 in cervical cancer screening. *Molecular and cellular probes* 2012; **26**(2): 66-72.
